# Supplementary material for: Review of recent advances in inorganic photoresists
Source: Royal Society of Chemistry journal article supplement (doi:10.1039/c9ra08977b), 2020-01-01
Supplement: c9ra08977b1.pdf [file c9ra08977b1.pdf]

## Review of recent advances in inorganic photoresists

Chaoyun Luo<sup>#,a,b</sup> Chanchan Xu,<sup>#,c</sup> Le Lv,<sup>#,a</sup> Hai Li,<sup>b</sup> Xiaoxi Huang,<sup>\*,b</sup> and Wei Liu,<sup>\*,b</sup>

a. School of Applied Chemistry and Biological Technology, Shenzhen Polytechnic, 7098 Liuxian Blvd, Nanshan District, Shenzhen, 518055, China.

b. Hoffmann Institute of Advanced Materials, Shenzhen Polytechnic, 7098 Liuxian Blvd, Nanshan District, Shenzhen, 518055, China

c. State-owned Assets Management Office, Shenzhen Polytechnic, 7098 Liuxian Blvd, Nanshan District, Shenzhen, 518055, China.

# These authors contributed equally.

Table S1. Selective examples of inorganic based photoresists and their lithographic performance.<sup>a</sup>

| Photoresist Major Composition                                                       | Method | Dose                                           | Developer                            | Positive/Negative | Resolution           | Ref |
|-------------------------------------------------------------------------------------|--------|------------------------------------------------|--------------------------------------|-------------------|----------------------|-----|
| HfO <sub>2</sub>                                                                    | E-beam | 103 μC/cm <sup>2</sup>                         | Isopropyl Alcohol                    | Negative          | 50 nm line           | 1   |
| HfO <sub>2</sub>                                                                    | E-beam | --                                             | tert-Amyl Alcohol                    | Negative          | 35 nm line           | 1   |
| HfO <sub>2</sub>                                                                    | E-beam | 30 μC/cm <sup>2</sup>                          | Organic Solvent                      | Negative          | 40 nm line           | 2   |
| HfO <sub>2</sub>                                                                    | DUV    | --                                             | Organic Solvent                      | Negative          | 50 nm h/p line       | 2   |
| ZrMAA                                                                               | EUV    | 5.6 mJ/cm <sup>2</sup>                         | Organic Developer                    | Negative          | 32 nm line           | 3   |
| ZrMAA                                                                               | EUV    | 4.2 mJ/cm <sup>2</sup>                         | Organic Developer                    | Negative          | 26 nm line           | 3   |
| ZircSO <sub>x</sub>                                                                 | E-beam | 999 μC/cm <sup>2</sup>                         | TMAH                                 | Negative          | 15 nm isolate line   | 4   |
| ZircSO <sub>x</sub>                                                                 | E-beam | 810 μC/cm <sup>2</sup>                         | TMAH                                 | Negative          | 36 nm dense line     | 4   |
| [(PhSn) <sub>12</sub> O <sub>14</sub> (OH) <sub>6</sub> ]Cl <sub>2</sub>            | EUV    | 350 mJ/cm <sup>2</sup>                         | 66% aqueous isopropanol              | Negative          | 18 nm dense line     | 5   |
| Tin oxo cage with acetate anion                                                     | EUV    | 68 mJ/cm <sup>2</sup>                          | 2/1 isopropanol/H <sub>2</sub> O     | Negative          | 30 nm h/p line       | 6   |
| Inpria Y-Series                                                                     | EUV    | 35 mJ/cm <sup>2</sup>                          | a proprietary organic developer      | Negative          | 13 nm h/p line/space | 7   |
| 3-methyl-phenyl-modified Zn-mTA cluster                                             | EUV    | 47 mJ/cm <sup>2</sup>                          | Decahydronaphthalene                 | Negative          | 15 nm h/p line/space | 8   |
| Zn (MA)(TFA)                                                                        | EUV    | 27 mJ/cm <sup>2</sup> or 37 mJ/cm <sup>2</sup> | Diluted propionic acid in chloroform | Negative          | 30 nm h/p line/space | 9   |
| Tri(phenyl)antimony diacrylate                                                      | EUV    | 5.6 mJ/cm <sup>2</sup>                         | Hexane                               | Negative          | 35 nm dense line     | 10  |
| (dppm)Pd(C <sub>2</sub> O <sub>4</sub> )                                            | EUV    | 50 mJ/cm <sup>2</sup>                          | 20% MIBK/Toluene                     | Positive          | 30 nm dense line     | 11  |
| [PPh <sub>3</sub> (CH <sub>2</sub> Ph)][Co(2,2'-bipyridine)(oxalate) <sub>2</sub> ] | EUV    | 30 mJ/cm <sup>2</sup>                          | Methyl ethyl ketone                  | Negative          | 20 nm h/p line       | 12  |

<sup>a</sup> Abbreviations: MA: methacrylate; MAA: methacrylate acid; TFA: trifluoroacetate; TMAH: tetramethylammonium hydroxide; R: aliphatic or aromatic group; dppm: 1,1-Bis(diphenylphosphino)methane; MIBK: methyl isobutyl ketone.

## Reference

1. M. Trikeriotis, W. J. Bae, E. Schwartz, M. Krysak, N. Lafferty, P. Xie, B. Smith, P. A. Zimmerman, C. K. Ober and E. P. Giannelis, *Proc. SPIE*, 2010, **7639**, 76390E.
2. M. Krysak, M. Trikeriotis, E. Schwartz, N. Lafferty, P. Xie, B. Smith, P. Zimmerman, W. Montgomery, E. Giannelis and C. K. Ober, *Proc. SPIE*, 2011, **7972**, 79721C.
3. M. Trikeriotis, M. Krysak, Y. S. Chung, C. Ouyang, B. Cardineau, R. Brainard, C. K. Ober, E. P. Giannelis and K. Cho, *Proc. SPIE*, 2012, **8322**, 83220U.
4. J. Stowers and D. A. Keszler, *Microelectronic Engineering*, 2009, **86**, 730-733.
5. B. Cardineau, R. Del Re, M. Marnell, H. Al-Mashat, M. Vockenhuber, Y. Ekinci, C. Sarma, D. A. Freedman and R. L. Brainard, *Microelectronic Engineering*, 2014, **127**, 44-50.
6. J. Haitjema, Y. Zhang, M. Vockenhuber, D. Kazazis, Y. Ekinci and A. Brouwer, *Journal of Micro/Nanolithography, MEMS, and MOEMS*, 2017, **16**, 033510.

7. A. Grenville, J. T. Anderson, B. L. Clark, P. D. Schepper, J. Edson, M. Greer, K. Jiang, M. Kocsis, S. T. Meyers, J. K. Stowers, A. J. Telecky, D. D. Simone and G. Vandenberghe, *Proc. SPIE*, 2015, **9425**, 94250S.
8. H. Xu, K. Sakai, K. Kasahara, V. Kosma, K. Yang, H. C. Herbol, J. Odent, P. Clancy, E. P. Giannelis and C. K. Ober, *Chemistry of Materials*, 2018, **30**, 4124-4133.
9. N. Thakur, M. Vockenhuber, Y. Ekinici and S. Castellanos, *Proc. SPIE*, 2019, **10957**, 9.
10. J. Passarelli, M. Murphy, R. D. Re, M. M. Sortland, J. Hotalen, L. Dousharm, R. Fallica, Y. Ekinici, M. Neisser, D. A. Freedman and R. L. Brainard, *Journal of Micro/Nanolithography, MEMS, and MOEMS*, 2015, **14**, 1-10, 10.
11. M. Sortland, R. D. Re, J. Passarelli, J. Hotalen, M. Vockenhuber, Y. Ekinici, M. Neisser, D. A. Freedman and R. L. Brainard, *Proc. SPIE*, 2015, **9422**, 942227.
12. M. Wilklow-Marnell, D. Moglia and B. Steimle, *Journal of Micro/Nanolithography, MEMS, and MOEMS*, 2018, **17**, 1.
